# Supplementary material for: Understanding the effect of oxide components on proton mobility in phosphate glasses using a statical analysis approach
Source: Royal Society of Chemistry journal article supplement (doi:10.1039/d0ra10327f), 2021-01-01
Supplement: d0ra10327f1.pdf [file d0ra10327f1.pdf]

## Supplementary Information

### Understanding the effect of oxide components on proton mobility in phosphate glasses using a statistical analysis approach

Takahisa Omata,<sup>\*a</sup> Issei Suzuki,<sup>a</sup> Aman Sharma,<sup>a</sup> Tomohiro Ishiyama,<sup>b</sup>  
Junji Nishii,<sup>c</sup> Toshiharu Yamashita<sup>d</sup> and Hiroshi Kawazoe<sup>d</sup>

<sup>a</sup> Institute of Multidisciplinary Research for Advanced Materials, Tohoku University, Katahira 2-1-1, Sendai 980-8577, Japan

<sup>b</sup> Fuel Cell Materials Group, Research Institute for Energy Conservation, National Institute of Advanced Industrial Science and Technology (AIST), AIST Central 5, Higashi 1-1-1, Tsukuba, Ibaraki 305-8565, Japan

<sup>c</sup> Research Institute for Electronic Science, Hokkaido University, Kita 21 Nishi 10, Kita-ku, Sapporo 001-0021, Japan

<sup>d</sup> Kawazoe Frontier Technologies Corporation, Kuden-cho 931-113, Sakae-ku, Yokohama 247-0014, Japan

#### S1. Linear Regression models

We first employed a general linear combination model, in which mol% of respective oxides are used as predictors, for both  $\log(\mu_{\text{H}} \text{ at } T_{\text{g}})$  and  $T_{\text{g}}$ . The regression algorithm used in this study is based on the linear regression as implemented in MATLAB (MathWorks, USA). The obtained model for  $\log(\mu_{\text{H}} \text{ at } T_{\text{g}})$  is as following:

$$\begin{aligned} \log(\mu_{\text{H}} \text{ at } T_{\text{g}}) = & -0.236388563x(\text{HO}_{1/2}) - 0.21732199x(\text{NaO}_{1/2}) - 0.128502192x(\text{WO}_3) \\ & + 0.671171102x(\text{NbO}_{5/2}) + 1.029198044x(\text{TaO}_{5/2}) + 1.374093231x(\text{MgO}) \\ & + 1.306366399x(\text{BaO}) + 1.971135165x(\text{LaO}_{3/2}) - 0.201698121x(\text{AlO}_{3/2}) \\ & - 0.284685842x(\text{YO}_{3/2}) + 1.859907493x(\text{GdO}_{3/2}) + 0.754725434x(\text{GeO}_2) \\ & - 0.629475199x(\text{BO}_{3/2}) - 0.293206847x(\text{PO}_{5/2}) \end{aligned} \quad (\text{S1})$$

Figure S1 shows comparison of experimentally observed and predicted values of  $\mu_{\text{H}} \text{ at } T_{\text{g}}$ . The root mean square error (RMSE) was 0.2278 and reasonably small. However, as shown in Fig. S2, the predicted values of  $\log(\mu_{\text{H}} \text{ at } T_{\text{g}})$  for the 55,296 phosphate glass compositions (see the main text) were unreasonable in the range of  $10^{-29} \sim 10^{17} \text{ cm}^2 \text{V}^{-1} \text{s}^{-1}$ , although the range of the experimentally observed values is  $2 \times 10^{-9} \sim 2 \times 10^{-7} \text{ cm}^2 \text{V}^{-1} \text{s}^{-1}$ . This indicates that the overtraining occurred maybe because of small number of training data.

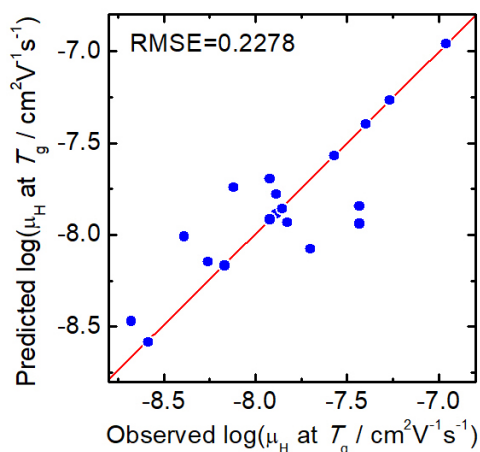

**Figure S1.** Comparison of experimentally observed and predicted values of  $\mu_{\text{H}} \text{ at } T_{\text{g}}$

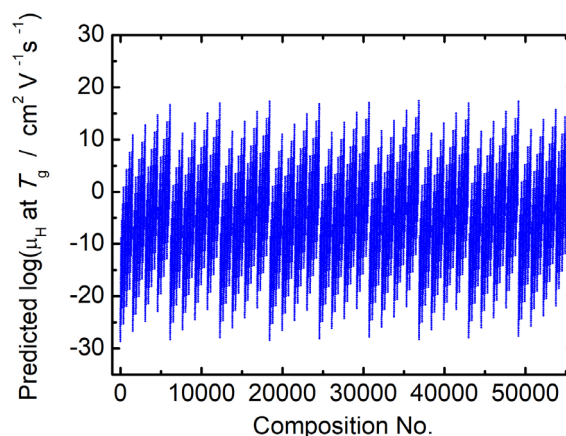

**Figure S2.** Predicted values of  $\log(\mu_{\text{H}} \text{ at } T_{\text{g}})$  for the 55,296 phosphate glass compositions.
